# Supplementary material for: Single-Step Selection of Drug Resistant Acinetobacter baylyi ADP1 Mutants Reveals a Functional Redundancy in the Recruitment of Multidrug Efflux Systems
Source: PLoS One. 2013 Feb 7;8(2):e56090. doi: 10.1371/journal.pone.0056090 (PMC3567077; doi:10.1371/journal.pone.0056090)
Supplement: Dataset S1 — Pairwise percent identity (top right; green) and similarity (bottom left; blue) comparisons of putative drug exporting MFS transporters. CraA orthologs encoded in Acinetobacter spp.,AB57_3600 (AB0057), ABBFA_000365 (AB307-0294), ABAYE0338 (AYE), ACICU_03346 (ACICU), ACIAD3292 (ADP1), A1S_3146 (ATCC 17978) and ABSDF0342 (SDF), were compared to the named previously characterised efflux systems. Sequences were obtained from the Transporter Classification Database (www.tcdb.org). (XLSX) [file pone.0056090.s001.xlsx]

## Sheet: DHA1_and_CraA_orth.fasta
	1. Bsu1	2. NorA	3. VMAT1	4. VAT1	5. Unc17	6. AraJ	7. YdeA	8. TPO1	9. Flr1	10. SotB	11. MdfA	12. CyhR	13. MdtG	14. YceL	15. YidY	16. Ffz1_Zb	17. CgMDR	18. PbuE	19. NepI	20. AlcS	21. VAChT	22. VMAT2	23. CmlA	24. HIATL1	25. QDR2	26. P31141	27. Hol1	28. PmrA	29. Caf5	30. Aqr1	31. LbtB	32. TetA39	33. TetA41	34. TetA	35. Dtr1	36. TetA42	37. EmrD-3	38. Qdr3	39. LtaA	40. Ffz1_Zr	41. Ffz2	42. HsMDR	43. A2QTF4	44. Q8ZUX8	45. LmrP	46. F0ZU09	47. CraA	48. MdtM	49. SLC22A18
1. Bsu1		17.7	17.3	16.9	16.2	18.3	18.4	25.1	25.1	16.4	19	23.9	17.3	15.9	14.9	21.9	19.4	18.4	17.3	16.4	16.2	18	19.3	18.2	17.1	17.4	20.2	17.8	25.3	21.4	18.7	17.4	18.2	19.6	22.7	17.2	19.2	20.5	16.9	20.4	23.3	16.2	16.3	17.4	17.3	16.5	16.5	18.8	17.5
2. NorA	34.8		16.1	16.2	17.2	20.8	20.8	17.5	17.4	21.9	19	18.4	22.9	20.9	17.6	14.2	21.4	22.1	17.8	20.9	14.8	19	18.6	18.2	16.1	19.7	16.7	25	18.3	17.3	19.8	28.1	29.1	25.2	17.4	26.3	22	15.5	19.6	15.6	16.4	20.9	19.2	28.8	17.7	18.9	18.3	21.3	17
3. VMAT1	38	35.7		82.9	33	16.7	18.1	18	20.5	19	21.6	19.3	17.6	20.1	19.5	17.5	18.2	18.3	19.1	17.5	36.8	63.2	20.5	18.7	19.4	19.1	18.3	18.4	19.4	20.1	20.2	18.3	21.2	18.9	18.8	19.3	19	17.7	17.8	16	18.7	20.9	17.9	17.8	17.3	18.6	18.9	17.1	17.3
4. VAT1	38.6	34.7	89.7		31.6	17.5	18.8	17.4	20.1	19.5	18.9	20.1	17.1	19.2	19.5	17.7	18.2	17.4	19.1	18.1	35.4	63.9	19	20.3	16.6	18.1	18.2	19.7	18.4	19.3	18.9	18.1	20.9	20.1	18.5	20.4	19.2	16.1	17.3	16.6	17.5	20.2	19.2	17.9	16.1	16.6	18.4	16.8	20
5. Unc17	37.6	38.7	56.8	56.8		18.6	18.1	15.6	16.2	20	19.4	18.2	18.6	17.1	17.8	18.5	19.2	17.1	19.3	19.7	43	33	20.4	18.8	17.6	20.1	17.3	18.2	19	18.8	19.7	18.8	20.8	19	17.3	20	16.5	18.1	19	17.4	17.7	20.4	20.3	18.5	17.2	18.1	16.7	19.7	20.5
6. AraJ	35.6	45.9	35.9	35	33.5		24.5	18.7	18.2	25.6	19.5	16.8	19	18.5	21.5	16.1	20.6	25.6	22.7	18.8	16.4	17.8	20.6	19.3	16.9	25.3	16.4	20.7	15.1	16.5	20	21.9	24.8	23	17.4	20.8	21.7	16.5	19.5	16.7	17.1	21.8	17.9	23.5	16.9	18.9	19.6	20.1	21.7
7. YdeA	35.2	44.9	37.8	37	34.8	51		17.8	16.9	63.4	20.8	18.6	21.5	16.3	21.9	14.8	22.1	25.1	25.6	21.3	16.7	18.9	22.6	17.3	16.8	25.6	16	20.2	17	18.3	19	20.9	21.5	22.8	16.9	19.4	23.5	16.3	16.4	16.6	16.7	19.1	17.7	20.5	17.5	21	19.1	17.9	18.3
8. TPO1	44.4	32.1	35.8	35.7	37.7	32.3	32.9		26.6	18	18	25	19	17.3	17.5	25.3	17.3	15.5	18.6	18.4	19	16.1	18.9	17.9	17.2	17.2	20	17.9	28.9	18.8	17.6	18.4	18.8	17	20.5	16.7	16	20.3	19	24.7	26.1	16.8	18	17.3	16.7	15.6	19.8	15.7	17.6
9. Flr1	46.5	33.9	39.8	38.5	34.9	32.1	32.1	49.7		18.8	18	38.5	18.3	15.8	15.9	22.4	17.1	18.7	15.1	18	17.2	18.9	18	18	17.6	18.6	19.7	18.4	41.1	21.1	17.4	18.3	17.1	18.5	21.2	18.9	18.3	21.9	16.6	23.4	23.4	16.9	16.8	15.6	18.2	17.1	19.2	17.6	16.8
10. SotB	36.1	45.3	35.3	36.8	37.6	48.6	79.8	31.1	33		21.4	18	21.9	20.6	22.4	17.8	20.7	28.1	26.8	24.8	20	18.4	21.1	18.3	18.9	27.4	17.7	21.9	18.5	15.1	17.3	22.6	22.4	23.2	18	19.4	25.1	16	20.1	17.1	16	18.7	19.2	21.3	19.3	21.8	22.6	20.1	20.3
11. MdfA	36.3	44.9	37.4	36	35.2	43.7	43.7	32.3	35.6	45.4		17.4	20.7	19.9	24.3	17.4	23.4	21.2	20.4	22.8	21.9	17.5	22.4	20.2	19.1	20.7	17.6	20.4	18.3	17.5	22.2	21.3	23.8	22	16.5	23.6	19	17.3	21.3	17.4	20.3	24.4	19.1	21.9	21.3	20	41.6	38.6	20
12. CyhR	47.6	33	38	39.9	38.8	33	35.9	49.1	60	34.8	35.3		18.6	16.8	17.9	21.8	17.1	18.3	18.7	16.6	19.1	18.8	17.2	18.7	18.7	18.7	19.6	17.8	39.5	21	18.4	16.9	19.5	17.9	21.8	18.1	18.4	21.3	18.2	22.5	21.4	17.1	17.6	17.4	16.9	17.5	18	19.9	18.6
13. MdtG	36.1	45.3	36.3	36.2	35.5	41.7	45.6	33.1	34.7	44.4	41.2	35.9		24.3	22.1	17.4	23.6	22.4	23.4	23.6	18.2	18.3	22	20.8	18.3	24.4	17.3	43.8	18.7	17.6	25.6	23.2	25.8	23.5	18.2	22.4	24.5	15.7	23.7	15	17	21.8	20.4	25.1	22.2	19.9	21.5	19.8	17.9
14. YceL	34.8	45.5	37	33.1	33.6	44	40	30.2	33.9	43.3	41.2	33	43.1		21	17.3	19.5	17.1	21.5	20.7	18.5	18.6	19	17.7	19.5	22.4	17.1	20.9	19.1	18.5	19.3	20.4	23.5	21.7	16.6	23.3	21.4	15.3	17.1	14.9	15.5	21.5	17.9	23.4	23.4	14.7	19.3	21.6	19.8
15. YidY	33.7	43.2	37.6	36.6	35	41.9	45.7	33.3	30.3	46.3	45.9	32.8	41.7	44.3		16.7	21.4	21.9	22.2	21.9	19.1	19.5	23.1	17.9	18.6	18.5	16.7	19.2	14.7	15.3	20	23.7	24.7	23.6	16.7	26.1	22.8	15.2	16.7	14.7	17.9	19.7	22	22.3	20	20	23.3	24.3	18.6
16. Ffz1_Zb	42.2	28.9	35.6	36	36	32.5	29.2	46.4	44	31.7	31.5	42.4	32.8	29.4	29.9		16.9	17.1	15.2	18.4	20.8	17.4	19.3	19.8	18.1	19.4	19.2	18.4	23.4	18.2	15.5	15	16.9	16.8	17.4	18.6	16.2	17.9	15.7	66	62.6	18.8	16	15.9	18.6	16.1	19	16.5	16.6
17. CgMDR	34.8	44.4	35.5	35.8	35.7	43.5	43.2	32.9	33.6	42.7	45.4	33.2	43.9	47.7	39.8	29.5		20.9	23.1	22	19.4	18.5	20.7	19.1	17.9	21.1	16.8	23.1	17	18.5	19	21.6	24.1	25.4	19.5	22.8	22.5	16.6	19.1	16.7	17.3	23.5	18.1	24.6	17.2	19.1	23.2	23.4	19.2
18. PbuE	35.4	45.6	35.5	35	31.8	49.2	55.6	29.9	33.6	55.4	40.7	35.9	45.8	41.8	46.3	29.4	44.2		23.9	22.2	19.2	18	21.7	18.8	19.6	26.4	17.6	23.9	19.1	17.5	18.5	21.7	23.4	21.6	19.1	21.1	20.9	14.6	20.6	17	16.1	21.4	18.1	20.4	17.8	21.2	22.5	17.2	21
19. NepI	34.2	42.7	36.7	35.8	34.6	47.7	50	34	32.3	48.5	45.6	33.7	43.9	45.3	48	30.7	44	50		21.6	20.7	19.5	22.4	20.3	18.6	27.3	19.4	20.4	18.3	15.7	19.8	22.9	21.8	21.1	17.9	22	21.1	16	19.5	15.9	15.1	21.6	20	21.2	21.5	18.9	18.9	20.1	20.3
20. AlcS	34.4	42	33.4	34.3	36.1	41.5	46.2	34.8	31.8	45.5	42.4	33.7	46.8	41.3	44.7	30	40.5	42.8	42.8		20.6	17.6	27.6	18.3	19.4	23	17.2	24.9	19	17.8	18.5	22.9	24.2	25.5	18.1	23.3	26.3	16.6	17.5	19.1	18.4	22.5	21.7	23.9	18.5	19.2	24	23.1	22.4
21. VAChT	36.7	37.6	58.8	58.1	61.1	33.6	36.1	36.2	32.1	39.3	37.2	38	37.4	33.6	35.7	37.8	35.5	36.1	35.9	34.8		35.7	20.9	20.2	16.9	22.7	17.6	17.6	20.6	18	20.1	17.6	22.3	19.7	19.2	20.1	15.8	17.4	18.4	18.3	19	22.4	19.6	21.3	18.2	18.6	18.4	18	19.9
22. VMAT2	38.2	35	80.8	80.6	54.5	36.8	40.1	38.2	39.6	37.4	37	38.4	38.9	34.4	37.7	36	36.4	35.4	37.7	35.4	59.8		20.5	19.4	19.4	18.5	18.6	17.9	19.2	21	20	18.2	19.7	20.3	19.2	22.3	17	17.2	19	18.1	18	22.9	18	18.2	17.2	17	18.7	16.3	17.2
23. CmlA	37.3	40.6	38.6	36.2	37	39.9	44.4	33.8	35.8	43.2	44.4	32.8	41.5	41.5	46.1	34.3	41.3	45.3	41.5	45.8	35.5	38.3		20.9	20.4	23.8	18.3	22.7	19.6	19.5	18.4	22.7	26	22.1	17.3	23.1	23.5	15.2	17.6	18.7	18.4	23.4	20.3	24.2	20.8	20.4	22.4	26.6	21.9
24. HIATL1	37.1	36.6	40.1	40	36.8	36.4	37	33.4	36.1	36.4	38.9	40.8	38.9	35.6	37.4	36.4	35.2	35.2	38.7	36.8	36.5	40.5	37.5		17.3	20.2	17	20.7	18.1	17.1	19.5	21.6	20.7	21.2	18.6	22.4	18	16.8	18	19.9	19.7	18.6	21.4	18.6	19.4	19.4	21	19.2	17.6
25. QDR2	36.3	38.3	37	34.9	36.1	36.6	36.4	31.9	34.1	35.7	37.7	35.9	39.6	35.7	37.7	31.5	35.9	37.9	34.6	35.9	32.5	35	35.7	35.6		18.1	16.4	19.3	18.1	35.4	16.7	20.6	21.5	19.9	21.2	20.7	21	16.9	16	19.5	17.1	17.3	16	17.1	20.1	21.7	19.5	17.6	17.9
26. P31141	32.7	43.4	35.3	34.7	33.8	48.2	50	30	30.5	48.4	38	34.2	42.9	41.5	38.5	30	40	51.5	48	42.3	33.8	33.5	39.6	35.4	33.5		17.4	22.9	19.4	17.4	18.5	23.2	26.8	28.2	18.4	24.5	22.8	15.9	19.2	16.4	17.7	22.9	19.9	24.4	20.3	17.4	20.1	21.2	24.8
27. Hol1	40.3	32.8	34.3	35.7	33.8	31.1	31.4	41.3	37	31.6	32.3	39.6	30.7	30.5	32.6	39.6	30.7	32.4	31.7	31.6	37.5	34	32.8	35.3	31.7	30		16.5	19.2	18.7	17.9	17.3	17.3	17.2	18.7	16.2	16.7	20.8	16.8	19.7	19.6	18.6	16.8	16.6	16.2	17.1	15.8	19.2	17
28. PmrA	36.3	49.4	34.5	34.1	33.1	45.6	46.9	32.1	34.1	44.1	45.1	33.2	67.4	41.5	46.9	32.3	44.9	45.9	43.4	47.4	35.9	36.8	42.5	37.2	36.6	39.3	31.6		18.2	19.5	24.1	22.7	23.7	20.1	19.5	21.3	21.6	15.8	20.8	16.4	18.8	20.7	19.1	24.9	20.9	22.8	20.2	18.5	22
29. Caf5	45.8	36.3	38.8	36.9	41	33	33.5	49	62.2	35.2	37.3	62.1	36.5	34.7	32	44.3	34.1	35.2	35.4	34.7	39.1	37.1	36.2	40.1	37.3	34.3	36.3	35.2		19.9	17.5	18.9	18.7	20.7	20.3	19	17	20.7	17.5	23.7	23.5	17.2	18.3	17.2	18.2	17.6	19.5	17.3	18.2
30. Aqr1	41.3	33.6	41.5	39.8	38.2	34.3	33.6	42.8	42	29.4	32.4	40.8	34	34.8	33.1	39.8	34	34.5	31.1	33.4	36.5	39.9	35.7	35.5	52.2	31.7	40.6	33.6	40.8		16	16.7	18.2	16.5	24	17.8	18.5	22.1	17.3	18.5	19.5	17.8	16.3	16.1	16.7	17.6	17.5	18.3	16.2
31. LbtB	33.7	44.3	36.5	37	33.5	42.3	40.3	31.9	34.9	41.1	42.7	35.7	49.8	40.3	42.1	31.3	43.2	40.6	42.6	38.3	36.5	37.5	40.1	38.3	37.4	37.4	34.3	47.3	36.2	32.4		20.9	20.8	20	18.2	20.3	21.2	16.1	19.1	15.3	16	20.4	17.7	18	20.7	21.9	19.7	19.5	21.6
32. TetA39	32.9	51.4	35.9	34.3	33.3	44.8	43.2	32.9	32.7	45.1	44.1	35.1	45.6	43.8	45.6	30	43.7	45.6	45.7	41	33.3	35.8	45.3	40.9	37.4	44.8	30.5	47.4	36.7	32.1	43.3		62.4	48.9	16.7	27.6	23.1	15.2	20.2	14.2	16.5	23.7	21.5	27.5	22.2	21	24.3	23.2	25.2
33. TetA41	32.5	52.2	37.6	37	35.9	44.2	43.9	34.1	33.2	43	43.4	33.9	43.9	43	47.8	28.2	45.7	43.5	44.4	43.5	36.5	37.4	46.3	39.5	39.2	47.6	30.4	45.1	36.7	30	42.1	79.5		51.9	17.2	33.4	29.1	15.2	21.3	15.4	15.3	24.6	22.1	28.5	22.1	19	23.5	24.1	27.8
34. TetA	34.4	47.4	37	37.1	35.7	42.1	43.9	32.1	33	43.1	41.7	34.2	44.1	40.3	44.6	27.6	46.4	44.6	41.1	43	35.7	37.7	43.7	38.3	39	44.1	28.7	45.4	35.2	31.2	41.3	67.9	69.7		16.4	31	26	15.3	19.8	15.3	16.9	24.4	21.2	27.3	21.7	18.1	24.3	21.7	24.6
35. Dtr1	45.1	34.6	37.4	37.6	36.4	32	33.7	42.5	42	34.6	33.2	44.8	33.9	32	34.4	37.2	33.6	35.3	34.8	33.9	33.6	35.8	33.7	33.6	38.3	32.3	41.3	33.2	43.4	44.2	33.7	32.7	32	31.1		16.7	19.6	22.7	17.4	18.1	17	17.2	16.5	19.2	17.4	15.8	18.4	16.2	18.7
36. TetA42	34.8	47.4	38.6	40.4	37	42.3	43	33.4	36.3	40.4	42.5	31.7	45.8	43.5	42.5	31	42.1	42.8	41.4	42.8	37	39.3	43.5	39.5	38.1	41.6	31.2	44.4	36	32.4	40.4	47	52.1	49.8	33.7		23.3	15.2	20.5	16.2	17	23.7	19.8	26	20.4	20.1	20	23.5	26.2
37. EmrD-3	34	46.4	35.9	36.6	33.1	44.7	46	32.8	33.4	45.6	43.9	34.6	42.6	43	48.8	29.1	42.7	47.7	46.2	46.4	33.5	37.7	46.1	33.8	38.1	43.4	33.4	43.6	33.3	34	43.1	47.1	50.1	47.6	34.6	45.6		13.7	19.4	16.1	17.8	18.9	19.3	23.2	20.2	18.9	24.6	23.4	20
38. Qdr3	37	29.3	32.4	30.5	32.2	28.9	28.9	40.2	40.2	27	28.7	38	28.2	28.3	29.2	37.2	29.2	28.7	28.7	29	33.1	32.4	29.5	32.8	31.5	27	40.1	28.3	38.3	38.8	29.9	28.6	27.4	28.7	43.8	29.9	27.9		16	15.8	17.9	16.5	15.4	15.8	17.5	17.1	17	14.9	14.8
39. LtaA	33.1	45.2	34.5	34.9	35.9	42.2	43.2	32.9	34.3	43.4	43.4	34.8	43.9	43.8	42.4	31	40.5	42.2	45.2	40.5	33.6	36.4	41.5	34.4	37	41.9	32.3	43.6	34.8	33.1	42.3	46.7	47.2	44.6	32.3	42.1	44.2	29.3		14.8	14.8	20.6	16.7	18.7	20.8	16.5	21.8	18.3	19.4
40. Ffz1_Zr	40.6	30.1	33.8	35.7	35.2	30.4	30.7	45.9	43.5	29.6	32.3	43	30.9	28.5	29.1	79.9	28.2	29.3	30.4	30.6	34.6	35.5	32	36.3	33.1	28.3	39.6	28.7	42.2	39.3	30.4	29.8	27.7	27.4	37.9	32.2	28.8	37.6	31.5		66.2	16.7	17.7	16.7	16	15.4	17.6	15	15.7
41. Ffz2	43.8	31.9	35.6	37.1	34.4	31.8	31.4	47.1	44.4	32.1	33.4	43.6	33.9	29	31.3	77.3	30.8	30	30.9	29.5	37.3	36.3	33.3	34.9	33.6	29.5	41.3	31.3	42.4	39.3	33.1	29.6	27.5	30.3	38.6	32.6	32.4	38.5	33.9	78.5		17.7	15.2	16.6	17.7	16.6	18.1	14.8	17.8
42. HsMDR	36.1	42.9	37.6	39	36.5	40.7	41.4	33.1	32.8	39	43.6	31.5	42.6	40.7	40.5	29.5	44.8	40.5	39.8	39.3	37.8	40.5	41	37	35.3	41.7	32.4	42.1	34.8	33.6	38.1	44.5	43.1	44.5	33.4	43	37.6	30.3	41.4	29.5	31.6		22.1	26.7	20.2	17.6	21.1	22	20.9
43. A2QTF4	33.5	41.6	35.1	35.6	35.9	38.7	40	32.6	30.7	41.6	37.3	33.5	39.5	40.4	40.2	29.1	39.5	38.7	39.5	42.6	33.3	36.6	40.1	37.2	34.2	38.5	32.4	39.2	34.7	34.1	38.5	41.9	40.9	42.1	32.9	42.1	41.6	29.3	37.8	31.1	30.1	40.7		20.1	19.9	18.6	18.4	19.3	21.6
44. Q8ZUX8	32.1	46.6	33.8	32.6	33.8	44.2	42.2	29.7	28.5	42	40.5	31.9	44.1	40.5	41.7	29.4	44	42	41.7	41.5	34.6	34.2	42.2	32.4	37	40.6	29.9	45.4	31.3	30.2	39.1	47.6	47.3	46.9	29.7	45.6	42	27.1	39.4	28.8	30.6	39.8	38.5		21.8	20.6	21.7	22.5	24.7
45. LmrP	35.2	41.7	33.2	33.9	32.1	38.2	39.2	32.3	32.7	42.6	44.4	34.8	45.8	43.4	40	31.7	40.9	42.6	44.6	39	35	37.2	43.2	36.8	37.4	40.9	31.4	43.4	36.9	34	40.9	46.3	41.9	42.2	33.9	42.8	42.4	31.2	41.9	29.8	30.8	43.3	37.3	38.5		17.7	20.1	21	19.8
46. F0ZU09	34.6	42.6	34.2	34.7	34.2	41.9	43.4	31.2	33.2	41.7	39.3	36.8	42.9	36.3	41.7	29.2	36.5	40.4	40.9	41.4	32.7	35.4	39.1	36	40.5	37	32.1	43.6	34.8	34	41.7	40.4	40.7	37.3	33.7	39.3	38.7	28.4	39.2	28.3	30.4	39	39.7	38	39.7		16.9	18.8	19.8
47. CraA	36.7	42.8	34.7	36.2	36.7	41.3	47.2	36.3	36.3	48.2	62.2	37.5	44.3	42.5	45.2	32.5	45	44.3	43.5	42.3	35.7	38.5	45.8	38.1	40.3	38.1	32.4	40.3	36.7	33.8	43.5	45.5	44	46.2	34.8	45.8	44.7	30.6	46.5	32.2	34.1	43.3	40.7	40.8	46.7	42.8		36.4	20.4
48. MdtM	37.8	44.1	35.9	35	36.5	43.2	46.1	31.2	35.2	44.4	62.7	35.3	44.6	46.6	47.3	31.5	45.4	39.5	42.4	44.1	33.3	36.6	49.4	35.4	37.9	40.7	33.6	42.2	36.7	31.4	42	42.7	45.4	42.2	36.9	44.4	45.1	29.6	43.2	30.4	31.4	41.2	40.7	38	48	39.8	60.2		19.6
49. SLC22A18	37.8	40.3	36.7	37	35.3	42.2	44.3	33.1	33.8	41.5	39.6	36.6	42	40.3	38.4	29.9	38.4	39.9	37.7	42.5	35.9	36	41	36.4	38.3	39.9	30.4	42.9	36.9	35	40.3	46.9	45.8	45.3	34.6	47.9	42.5	28.9	41.7	29.1	30.8	41.7	42	43.2	40.6	40.6	44.1	39.9
50. CaMDR1	45.6	31.4	35.3	37.1	36	34.4	32.4	50	61.3	33	33.2	71.8	35.3	33.9	33.2	40.6	30.9	34.4	34	31.2	36.2	37.6	33.3	36.2	35.5	33	37.9	32.3	62.1	41	35.5	31.7	33	33.9	44.8	33.2	31	40.3	32.8	40.8	43.6	31.2	32.1	31.7	33.2	31.7	35.3	33.2	33.2
51. Bcr	36.9	46.7	35.9	37.3	34.6	42.7	45.2	33.3	35	43.9	45.4	35.7	43.6	46.3	49.5	30.8	44	45.5	46.2	50.4	35.7	35	51.6	33.4	39.2	42.4	34.3	44.4	37.5	33.4	42.3	44.2	44.7	43.6	36.5	43.5	52.5	30	44.7	29.3	31.1	43.6	40.4	45.2	42.6	39.7	49.6	43.9	42.7
52. Blt	34	64.5	37.4	37	37.8	44.3	44	32.6	32.5	45	44.4	34.4	47.8	45.5	42.8	30.2	45.9	47.3	43.8	40	36.7	37.2	47.5	39.3	39.6	42	32.1	47.3	36.5	32.1	45	52.8	54	50.5	33.9	53.5	44.3	28.6	44.3	30.1	30.9	45.5	41.4	46	42.6	40.7	45.7	44.9	45.8
53. EmrD	36.1	46.7	36.5	36	33.3	44.2	46	31.7	34.3	44.3	44.1	33.5	42.6	43	47.5	30.4	44	45.2	44.7	46.9	34.4	37.5	45.6	35	38.5	41.6	30.4	44.6	36.9	35	39.1	44.6	45.2	41.4	33.6	40.9	49.5	29.8	44.9	29.1	30.3	40	39.7	41.9	42.9	42.4	46.2	45.1	42
54. AB57_3600	36.7	42.8	34.7	36.2	36.7	41.3	47.2	36.3	36.3	48.2	62.2	37.5	44.3	42.5	45.2	32.5	45	44.3	43.5	42.3	35.7	38.5	45.8	38.1	40.3	38.1	32.4	40.3	36.7	33.8	43.5	45.5	44	46.2	34.8	45.8	44.7	30.6	46.5	32.2	34.1	43.3	40.7	40.8	46.7	42.8	100	60.2	44.1
55. ABBFA_000365	36.7	42.8	34.7	36.2	36.7	41.3	47.2	36.3	36.3	48.2	62.2	37.5	44.3	42.5	45.2	32.5	45	44.3	43.5	42.3	35.7	38.5	45.8	38.1	40.3	38.1	32.4	40.3	36.7	33.8	43.5	45.5	44	46.2	34.8	45.8	44.7	30.6	46.5	32.2	34.1	43.3	40.7	40.8	46.7	42.8	100	60.2	44.1
56. ABAYE0338	36.7	42.8	34.7	36.2	36.7	41.3	47.2	36.3	36.3	48.2	62.2	37.5	44.3	42.5	45.2	32.5	45	44.3	43.5	42.3	35.7	38.5	45.8	38.1	40.3	38.1	32.4	40.3	36.7	33.8	43.5	45.5	44	46.2	34.8	45.8	44.7	30.6	46.5	32.2	34.1	43.3	40.7	40.8	46.7	42.8	100	60.2	44.1
57. ACICU_03346	37.1	42.3	34.9	36.2	36.8	41.1	46.9	36.7	36.3	47.9	62.4	37.3	43	42.3	45.5	32.6	44.5	44.7	43.8	42.3	36.1	38.7	46.1	37.9	40.3	38.9	32.6	40.3	36.7	33.8	43.8	45.7	45.2	46.2	34.6	45.6	44.7	30.8	46.7	32.3	34.1	43.3	40.7	41.1	46.2	42.5	99.8	60.5	44.3
58. ACIAD3292	35.7	44	32.1	34.5	35.7	39.9	45.7	35.3	39.4	44.3	63.9	36.6	41.8	40.1	46.9	31.5	41.6	44.5	42.1	42.1	34.8	36.4	44.4	38.3	40.9	39.1	34.1	43.5	39	33.6	45.5	43.5	44	45.5	35.3	44.2	45	30.3	45.5	30.6	32.3	42.4	40.9	40.3	46.2	38.4	89	60.7	42.5
59. A1S_3146	35.2	44.1	34.5	35.6	35.9	42.3	47.7	34.5	35	48.6	60.5	36.1	43.4	42.8	45.8	31.3	44.7	44.8	43.4	42	34.8	37.5	45.3	37.9	40.3	39.5	31.1	41.4	35.6	31.9	43.3	46.6	44.8	46.6	32.9	45.1	46.3	29.2	46.5	31.4	33.3	42.4	38.5	41.8	46.6	42.6	96.6	59.3	40.3
60. ABSDF0342	36.7	42.5	34.9	36.2	36.7	41.3	46.9	36.3	36.3	48.2	62.2	37.5	44.3	42.5	45.2	32.5	45	45.5	43.5	42.3	35.7	38.5	45.8	38.1	40.3	38.1	32.4	40.3	37.1	33.8	43.5	46.2	44	46.2	35.3	45.8	44.7	30.6	46	32.2	34.1	43.3	40.7	40.8	46.7	42.8	100	60.2	44.1
[truncated: 11 more columns]
