# Supplementary material for: Single-Step Selection of Drug Resistant Acinetobacter baylyi ADP1 Mutants Reveals a Functional Redundancy in the Recruitment of Multidrug Efflux Systems
Source: PLoS One. 2013 Feb 7;8(2):e56090. doi: 10.1371/journal.pone.0056090 (PMC3567077; doi:10.1371/journal.pone.0056090)
Supplement: Dataset S2 — Pairwise percent identity (top right; green) and similarity (bottom left; blue) comparisons of putative drug exporting RND transporters. Putative exporters from the RND superfamily encoded in Acinetobacter strains AB0057 (locus-tag prefix AB57), AB307-0294 (locus-tag prefix ABBFA), AYE (locus-tag prefix ABAYE), ACICU (locus-tag prefix ACICU), ADP1 (locus-tag prefix ACIAD), ATCC 17978 (locus-tag prefix A1S) and SDF (locus-tag prefix ABSDF) were compared to previously characterised RND superfamily transporters labelled by Genbank protein id. Exporter sequences were obtained from the Transporter Classification Database (www.tcdb.org). (XLSX) [file pone.0056090.s002.xlsx]

## Sheet: Table_SX_RND_pairwise_identity_
	1. AB57_3903	2. A1S_3445_6	3. ABBFA_000034	4. ABAYE0031	5. ACICU_03646	6. ABSDF3638	7. ACIAD3624	8. ABAYE0664	9. AB57_3318	10. ACICU_03066	11. ABBFA_000644	12. ABSDF0634	13. A1S_2818	14. ACIAD0783	15. ACIAD1158	16. ACIAD3423	17. ACIAD3422	18. ACIAD1159	19. ABSDF0737	20. A1S_2736	21. ACICU_02988	22. AB57_3157	23. ABBFA_000732	24. ABAYE0747	25. ACIAD2944	26. ABAYE0827	27. ABBFA_000816	28. AB57_3075	29. ACICU_02904	30. A1S_2660	31. ACIAD2836	32. ABAYE1822	33. ABBFA_001708	34. AB57_2081	35. A1S_1750	36. ACICU_01824	37. ACICU_02505	38. A1S_2305	39. AB57_2663	40. ABBFA_001138	41. ABAYE1173	42. ABSDF1462	43. ABBFA_003402	44. AB57_0158	45. ABAYE3753	46. ACICU_00143	47. A1S_0116	48. ACICU_00528	49. A1S_0519
1. AB57_3903		99.8	100	100	99.4	98.3	83.6	23	23.1	23	23.1	23.1	23.1	24.6	22.3	21	23.9	22.7	23.2	23.3	23.2	23.2	23.2	23.2	24.5	24.2	24.2	24.2	24	24.1	23.9	24.1	24.1	24.1	23.8	23.8	21.9	22.1	22.1	22.1	22.1	22	17.4	17.4	17.4	17.8	17.2	19.8	19.7
2. A1S_3445_6	100		99.8	99.8	99.6	98.5	83.5	23	23.1	23	23.1	23.1	23.1	24.6	22.3	21.1	23.9	22.7	23.1	23.2	23.1	23.1	23.1	23.1	24.4	24.1	24.1	24.1	23.9	24	23.8	23.3	23.3	23.3	23	23.2	22	22	22	22	22	21.9	17.4	17.4	17.4	17.7	17.4	19.5	19.4
3. ABBFA_000034	100	100		100	99.4	98.3	83.6	23	23.1	23	23.1	23.1	23.1	24.6	22.3	21	23.9	22.7	23.2	23.3	23.2	23.2	23.2	23.2	24.5	24.2	24.2	24.2	24	24.1	23.9	24.1	24.1	24.1	23.8	23.8	21.9	22.1	22.1	22.1	22.1	22	17.4	17.4	17.4	17.8	17.2	19.8	19.7
4. ABAYE0031	100	100	100		99.4	98.3	83.6	23	23.1	23	23.1	23.1	23.1	24.6	22.3	21	23.9	22.7	23.2	23.3	23.2	23.2	23.2	23.2	24.5	24.2	24.2	24.2	24	24.1	23.9	24.1	24.1	24.1	23.8	23.8	21.9	22.1	22.1	22.1	22.1	22	17.4	17.4	17.4	17.8	17.2	19.8	19.7
5. ACICU_03646	99.7	99.7	99.7	99.7		98.1	83.7	23.2	23.3	23.2	23.3	23.4	23.3	24.4	22.2	21.2	23.9	22.7	22.8	22.9	22.8	22.8	22.8	22.8	23.9	24.3	24.3	24.3	24.2	24.2	24	23.7	23.7	23.7	23.5	23.6	22.2	22.2	22.2	22.2	22.2	22.1	17.2	17.2	17.2	16.9	17.5	19.5	19.4
6. ABSDF3638	99	99	99	99	98.7		82.9	23	23.1	23	23.1	23.1	23.1	24.9	22.3	21.1	23.9	23.1	23.1	23.2	23.1	23.1	23.1	23.1	24.3	23.9	23.9	23.9	23.7	23.8	23.9	23.5	23.5	23.5	23.2	23.4	22	22	22	22	22	21.9	17.2	17.2	17.2	17.5	17	19.4	19.2
7. ACIAD3624	92.7	92.7	92.7	92.7	92.8	92		22.5	22.6	22.5	22.6	22.7	22.6	23.3	22.1	20.3	23.1	22.8	23.3	23.2	23.3	23.3	23.3	23.3	23.6	25.3	25.3	25.3	25.2	25.4	23.3	22.5	22.5	22.5	22.2	22.3	22.3	22.8	22.8	22.8	22.8	22.7	17.3	17.3	17.3	17.2	17.7	20.6	19.8
8. ABAYE0664	48.6	48.6	48.6	48.6	49.1	48.4	47.7		99.9	99.7	99.9	99.7	99.7	80.2	30.6	30.6	29.5	28.2	28	28.1	28	28	28	28	28.6	28.6	28.6	28.6	28.6	28.6	27.7	28.2	28.2	28.2	28.2	28.2	27	26.9	26.9	26.9	26.9	26.8	18.1	18.1	18.1	18.6	18.2	18.9	19.2
9. AB57_3318	48.7	48.7	48.7	48.7	49.2	48.5	47.8	99.9		99.8	100	99.8	99.8	80.3	30.7	30.6	29.5	28.2	28	28.1	28	28	28	28	28.6	28.7	28.7	28.7	28.7	28.7	27.8	28.2	28.2	28.2	28.2	28.2	27	26.9	26.9	26.9	26.9	26.8	18.3	18.3	18.3	18.9	18.2	18.9	19.1
10. ACICU_03066	48.6	48.6	48.6	48.6	49.1	48.4	47.7	99.7	99.8		99.8	99.8	99.8	80.1	30.7	30.6	29.6	28.2	27.9	28	27.9	27.9	27.9	27.9	28.6	28.7	28.7	28.7	28.7	28.7	27.7	28.2	28.2	28.2	28.2	28.2	27	26.9	26.9	26.9	26.9	26.8	18.3	18.3	18.3	18.9	18.2	19.4	19.5
11. ABBFA_000644	48.7	48.7	48.7	48.7	49.2	48.5	47.8	99.9	100	99.8		99.8	99.8	80.3	30.7	30.6	29.5	28.2	28	28.1	28	28	28	28	28.6	28.7	28.7	28.7	28.7	28.7	27.8	28.2	28.2	28.2	28.2	28.2	27	26.9	26.9	26.9	26.9	26.8	18.3	18.3	18.3	18.9	18.2	18.9	19.1
12. ABSDF0634	48.7	48.7	48.7	48.7	49.2	48.5	47.8	99.8	99.9	99.9	99.9		99.8	80.1	30.6	30.7	29.6	28.2	28	28.1	28	28	28	28	28.7	28.8	28.8	28.8	28.8	28.8	27.8	28.2	28.2	28.2	28.2	28.2	27	26.9	26.9	26.9	26.9	26.8	18.3	18.3	18.3	18.9	18.2	19.2	19.1
13. A1S_2818	48.8	48.8	48.8	48.8	49.3	48.6	47.9	99.8	99.9	99.9	99.9	100		80.1	30.7	30.6	29.6	28.2	28	28.1	28	28	28	28	28.6	28.8	28.8	28.8	28.8	28.8	27.8	28.3	28.3	28.3	28.3	28.2	27	26.9	26.9	26.9	26.9	26.8	18.6	18.6	18.6	18.8	18.2	19	19
14. ACIAD0783	47.4	47.4	47.4	47.4	47.3	47.2	47.6	91	91.1	90.9	91.1	91	91		29.9	29.5	28.2	27	28.5	28.5	28.5	28.5	28.5	28.5	28.3	28.1	28.1	28.1	28.1	28.2	27.1	28.2	28.2	28.2	28.2	28.1	26.5	26.5	26.4	26.4	26.4	26.4	18.2	18.2	18.2	17.8	17.3	19.9	19.6
15. ACIAD1158	48.2	48.2	48.2	48.2	48.2	48	47	57	57.1	57.1	57.1	57.1	57.1	55.4		52.9	42.6	37	27.9	27.9	27.9	27.9	27.9	27.9	28.3	27.9	27.9	27.9	27.9	27.8	28.3	28.2	28.1	28.1	28.2	28.1	27.2	27.2	27.2	27.2	27.2	27.1	17.1	17.1	17.1	16.4	17.2	19.1	18.8
16. ACIAD3423	47.2	47.2	47.2	47.2	47.2	47.4	46.9	55.3	55.4	55.5	55.4	55.4	55.5	53.7	74.5		44.6	37.5	26.4	26.4	26.4	26.4	26.4	26.4	27	27.3	27.3	27.3	27.3	27.3	26.4	26.8	26.8	26.8	26.7	27.4	29.6	29.6	29.6	29.6	29.6	29.6	17.3	17.3	17.3	17.2	16.8	18.9	18.5
17. ACIAD3422	48.1	48.1	48.1	48.1	48.3	48.3	48.2	55.4	55.5	55.6	55.5	55.6	55.6	53.2	65.4	66.8		40.5	26.1	26.1	26.1	26.1	26.1	26.1	25.8	28	28	28	27.9	27.6	27.1	26.4	26.4	26.4	26.3	26.3	28.4	28.4	28.4	28.4	28.4	28.4	18.4	18.4	18.4	17.9	18	18.1	17.3
18. ACIAD1159	45.8	45.8	45.8	45.8	45.9	46.2	47	52.6	52.7	52.7	52.7	52.7	52.7	52.7	61.3	59.6	62.6		27.3	27.3	27.3	27.3	27.3	27.3	27.2	29.1	29.1	29.1	28.9	29.3	27.5	25.5	25.6	25.6	25.4	25.3	28.9	28.9	28.9	28.9	28.9	28.9	17.4	17.4	17.4	18.4	17.3	18.3	18.5
19. ABSDF0737	48.7	48.7	48.7	48.7	48.1	48.3	48.2	52.1	52.2	52.1	52.2	52.2	52.2	52.6	53.5	53.5	51.6	50.8		99.9	100	100	100	100	88.8	47.1	47.1	47.1	47.1	47.1	47.7	44.3	44.4	44.4	44.3	44.3	41.2	41.2	41.2	41.2	41.2	41.1	16.4	16.4	16.4	17.2	16.6	18.7	18.6
20. A1S_2736	48.7	48.7	48.7	48.7	48.1	48.3	48.2	52.1	52.2	52.1	52.2	52.2	52.2	52.6	53.6	53.4	51.6	50.8	100		99.9	99.9	99.9	99.9	88.7	47.1	47.1	47.1	47.1	47.1	47.7	44.3	44.4	44.4	44.3	44.3	41.2	41.2	41.2	41.2	41.2	41.1	16.4	16.4	16.4	17.2	16.6	18.7	18.6
21. ACICU_02988	48.7	48.7	48.7	48.7	48.1	48.3	48.2	52.1	52.2	52.1	52.2	52.2	52.2	52.6	53.5	53.5	51.6	50.8	100	100		100	100	100	88.8	47.1	47.1	47.1	47.1	47.1	47.7	44.3	44.4	44.4	44.3	44.3	41.2	41.2	41.2	41.2	41.2	41.1	16.4	16.4	16.4	17.2	16.6	18.7	18.6
22. AB57_3157	48.7	48.7	48.7	48.7	48.1	48.3	48.2	52.1	52.2	52.1	52.2	52.2	52.2	52.6	53.5	53.5	51.6	50.8	100	100	100		100	100	88.8	47.1	47.1	47.1	47.1	47.1	47.7	44.3	44.4	44.4	44.3	44.3	41.2	41.2	41.2	41.2	41.2	41.1	16.4	16.4	16.4	17.2	16.6	18.7	18.6
23. ABBFA_000732	48.7	48.7	48.7	48.7	48.1	48.3	48.2	52.1	52.2	52.1	52.2	52.2	52.2	52.6	53.5	53.5	51.6	50.8	100	100	100	100		100	88.8	47.1	47.1	47.1	47.1	47.1	47.7	44.3	44.4	44.4	44.3	44.3	41.2	41.2	41.2	41.2	41.2	41.1	16.4	16.4	16.4	17.2	16.6	18.7	18.6
24. ABAYE0747	48.7	48.7	48.7	48.7	48.1	48.3	48.2	52.1	52.2	52.1	52.2	52.2	52.2	52.6	53.5	53.5	51.6	50.8	100	100	100	100	100		88.8	47.1	47.1	47.1	47.1	47.1	47.7	44.3	44.4	44.4	44.3	44.3	41.2	41.2	41.2	41.2	41.2	41.1	16.4	16.4	16.4	17.2	16.6	18.7	18.6
25. ACIAD2944	48.9	49	48.9	48.9	48.5	48.3	48.6	52.4	52.5	52.5	52.5	52.6	52.6	52.1	53.6	53.4	52.7	50.8	96.5	96.5	96.5	96.5	96.5	96.5		47.7	47.7	47.7	47.7	47.7	48.1	44.6	44.6	44.6	44.8	44.7	41.5	41.5	41.5	41.5	41.5	41.4	17.1	17.1	17.1	17.3	17	19	19.3
26. ABAYE0827	47.5	47.5	47.5	47.5	47.5	47.1	48.7	54.1	54.2	54.2	54.2	54.3	54.3	52.7	51.8	50.5	51.1	51.8	67.2	67.2	67.2	67.2	67.2	67.2	67.9		100	100	99.7	99.6	62	40.1	40.1	40.1	40	40.1	37.6	37.6	37.6	37.6	37.6	37.4	17.4	17.4	17.4	17.3	17.1	18.3	17.6
27. ABBFA_000816	47.5	47.5	47.5	47.5	47.5	47.1	48.7	54.1	54.2	54.2	54.2	54.3	54.3	52.7	51.8	50.5	51.1	51.8	67.2	67.2	67.2	67.2	67.2	67.2	67.9	100		100	99.7	99.6	62	40.1	40.1	40.1	40	40.1	37.6	37.6	37.6	37.6	37.6	37.4	17.4	17.4	17.4	17.3	17.1	18.3	17.6
28. AB57_3075	47.5	47.5	47.5	47.5	47.5	47.1	48.7	54.1	54.2	54.2	54.2	54.3	54.3	52.7	51.8	50.5	51.1	51.8	67.2	67.2	67.2	67.2	67.2	67.2	67.9	100	100		99.7	99.6	62	40.1	40.1	40.1	40	40.1	37.6	37.6	37.6	37.6	37.6	37.4	17.4	17.4	17.4	17.3	17.1	18.3	17.6
29. ACICU_02904	47.6	47.6	47.6	47.6	47.5	47.2	48.5	54.1	54.2	54.2	54.2	54.3	54.3	52.8	51.7	50.4	51.2	51.9	67.2	67.2	67.2	67.2	67.2	67.2	67.9	99.9	99.9	99.9		99.5	62	40.1	40.1	40.1	40	40.1	37.6	37.6	37.6	37.6	37.6	37.4	17.3	17.3	17.3	17.3	17.1	18.3	17.6
30. A1S_2660	47.5	47.5	47.5	47.5	47.5	47.1	48.8	53.7	53.8	53.8	53.8	53.9	53.9	52.9	51.7	50.5	51.7	51.9	67.1	67.1	67.1	67.1	67.1	67.1	67.8	99.8	99.8	99.8	99.7		61.9	40.2	40.2	40.2	40.1	40.2	37.5	37.5	37.5	37.5	37.5	37.3	17.8	17.8	17.8	17.7	17.1	18.4	17.7
31. ACIAD2836	48.2	48.1	48.2	48.2	48.1	47.7	48.1	52.2	52.3	52.2	52.3	52.3	52.3	51	51.5	50	50.1	50.8	67.4	67.4	67.4	67.4	67.4	67.4	66.7	81.3	81.3	81.3	81.3	81.1		39.5	39.5	39.5	39.6	39.5	37	37	37	37	37	36.9	18.7	18.7	18.7	18.8	19.3	18.5	18.5
32. ABAYE1822	47.1	46.3	47.1	47.1	47.1	46.3	47.1	51.5	51.6	51.6	51.6	51.7	51.7	51	52.8	52.5	50.5	52	68.6	68.6	68.6	68.6	68.6	68.6	69.4	64.6	64.6	64.6	64.6	64.7	63.5		99.9	99.9	99.5	99.5	39.2	39.2	39.2	39.2	39.2	39.1	16	16	16	16.9	16.8	17.9	18.5
33. ABBFA_001708	47	46.2	47	47	47	46.2	47	51.6	51.7	51.7	51.7	51.8	51.8	51	52.8	52.5	50.4	52.1	68.6	68.6	68.6	68.6	68.6	68.6	69.4	64.5	64.5	64.5	64.5	64.6	63.5	99.9		100	99.4	99.4	39.2	39.2	39.2	39.2	39.2	39.1	15.9	15.9	15.9	16.7	16.9	18.1	18.6
34. AB57_2081	47	46.2	47	47	47	46.2	47	51.6	51.7	51.7	51.7	51.8	51.8	51	52.8	52.5	50.4	52.1	68.6	68.6	68.6	68.6	68.6	68.6	69.4	64.5	64.5	64.5	64.5	64.6	63.5	99.9	100		99.4	99.4	39.2	39.2	39.2	39.2	39.2	39.1	15.9	15.9	15.9	16.7	16.9	18.1	18.6
35. A1S_1750	46.9	46.1	46.9	46.9	46.9	46.1	46.8	51.5	51.6	51.6	51.6	51.7	51.7	51.1	52.8	52.2	50.5	52	68.8	68.8	68.8	68.8	68.8	68.8	69.6	64.6	64.6	64.6	64.6	64.7	63.6	99.8	99.7	99.7		99.4	39.2	39.2	39.2	39.2	39.2	39.1	16.3	16.3	16.3	16.3	16.3	18.3	18.4
36. ACICU_01824	46.7	46.1	46.7	46.7	46.9	46.1	46.9	51.5	51.6	51.6	51.6	51.7	51.7	51	52.7	53.1	50.5	52	68.6	68.6	68.6	68.6	68.6	68.6	69.5	64.7	64.7	64.7	64.7	64.8	63.6	99.7	99.6	99.6	99.7		39	39	39	39	39	38.9	16.1	16.1	16.1	16.4	16.3	18.2	18.5
37. ACICU_02505	45.7	45.6	45.7	45.7	45.9	45.9	45.8	52	52	52.1	52	52	52.1	51	51.5	54.8	51.7	53.4	63.9	64	63.9	63.9	63.9	63.9	63.6	58.9	58.9	58.9	58.9	58.8	58.6	62.5	62.4	62.4	62.5	62.4		99.9	99.8	99.8	99.8	99.4	18.6	18.6	18.6	18.5	18	19.4	19.2
38. A1S_2305	45.9	45.6	45.9	45.9	46.1	45.9	46.5	52	52	52.1	52	52	52.1	51	51.5	54.8	51.7	53.4	63.9	64	63.9	63.9	63.9	63.9	63.6	58.9	58.9	58.9	58.9	58.8	58.6	62.5	62.4	62.4	62.5	62.4	100		99.9	99.9	99.9	99.5	18.6	18.6	18.6	18.5	18	19.4	19.2
39. AB57_2663	45.9	45.6	45.9	45.9	46.1	45.9	46.5	52	52	52.1	52	52	52.1	50.9	51.5	54.8	51.7	53.4	63.9	64	63.9	63.9	63.9	63.9	63.6	58.9	58.9	58.9	58.9	58.8	58.6	62.5	62.4	62.4	62.5	62.4	99.9	99.9		100	100	99.4	18.6	18.6	18.6	18.5	17.9	19.5	19.3
40. ABBFA_001138	45.9	45.6	45.9	45.9	46.1	45.9	46.5	52	52	52.1	52	52	52.1	50.9	51.5	54.8	51.7	53.4	63.9	64	63.9	63.9	63.9	63.9	63.6	58.9	58.9	58.9	58.9	58.8	58.6	62.5	62.4	62.4	62.5	62.4	99.9	99.9	100		100	99.4	18.6	18.6	18.6	18.5	17.9	19.5	19.3
41. ABAYE1173	45.9	45.6	45.9	45.9	46.1	45.9	46.5	52	52	52.1	52	52	52.1	50.9	51.5	54.8	51.7	53.4	63.9	64	63.9	63.9	63.9	63.9	63.6	58.9	58.9	58.9	58.9	58.8	58.6	62.5	62.4	62.4	62.5	62.4	99.9	99.9	100	100		99.4	18.6	18.6	18.6	18.5	17.9	19.5	19.3
42. ABSDF1462	45.8	45.5	45.8	45.8	46	45.8	46.5	51.9	51.9	52	51.9	51.9	52	50.9	51.3	54.5	51.6	53.2	63.8	63.9	63.8	63.8	63.8	63.8	63.5	58.8	58.8	58.8	58.8	58.7	58.5	62.3	62.2	62.2	62.3	62.2	99.8	99.8	99.7	99.7	99.7		18.6	18.6	18.6	18.5	18	19.4	19.5
43. ABBFA_003402	35.6	35.6	35.6	35.6	35.4	35.5	35.3	37.1	36.8	36.8	36.8	36.8	36.3	36.3	35.7	36.1	37.2	34.8	35	35	35	35	35	35	35.9	35	35	35	34.9	34.9	35.4	36.1	35.9	35.9	35.9	35.8	37.5	37.5	37.4	37.4	37.4	37.5		100	100	99.1	94.2	15.5	16
44. AB57_0158	35.6	35.6	35.6	35.6	35.4	35.5	35.3	37.1	36.8	36.8	36.8	36.8	36.3	36.3	35.7	36.1	37.2	34.8	35	35	35	35	35	35	35.9	35	35	35	34.9	34.9	35.4	36.1	35.9	35.9	35.9	35.8	37.5	37.5	37.4	37.4	37.4	37.5	100		100	99.1	94.2	15.5	16
45. ABAYE3753	35.6	35.6	35.6	35.6	35.4	35.5	35.3	37.1	36.8	36.8	36.8	36.8	36.3	36.3	35.7	36.1	37.2	34.8	35	35	35	35	35	35	35.9	35	35	35	34.9	34.9	35.4	36.1	35.9	35.9	35.9	35.8	37.5	37.5	37.4	37.4	37.4	37.5	100	100		99.1	94.2	15.5	16
46. ACICU_00143	35.9	35.9	35.9	35.9	35.2	35.9	35	37.1	36.8	36.8	36.8	36.8	36.8	36.3	35	36.6	37.4	35.5	34.3	34.3	34.3	34.3	34.3	34.3	35.9	34.5	34.5	34.5	34.6	34.5	35.3	36.2	35.9	35.9	35.8	35.9	37.6	37.6	37.5	37.5	37.5	37.6	99.5	99.5	99.5		94.6	15.5	15.6
47. A1S_0116	37.5	37.5	37.5	37.5	37.6	37.5	37.6	37.5	37.5	37.5	37.5	37.5	37.5	37.1	38.1	38	38.9	36.4	35.7	35.7	35.7	35.7	35.7	35.7	36.4	38.3	38.3	38.3	38.3	38.4	36.9	36.9	36.9	36.9	36.4	36.5	38.1	38.1	38	38	38	38.1	94.7	94.7	94.7	95		15.4	15.8
48. ACICU_00528	36.9	37	36.9	36.9	37.2	37.2	36.6	37	37	37	37	36.9	36.6	37.4	35.3	35	35.1	34	35.4	35.4	35.4	35.4	35.4	35.4	36	36.6	36.6	36.6	36.7	36.8	34.8	34.8	35.1	35.1	35.7	34.9	35.7	35.7	35.8	35.8	35.8	35.6	32.2	32.2	32.2	32.3	32.6		97.8
49. A1S_0519	37.1	37.2	37.1	37.1	37.1	37.2	36.6	36.5	36.1	36.7	36.1	36.1	36.1	37.2	35.6	34.4	34.4	35.1	34.8	34.8	34.8	34.8	34.8	34.8	35.3	37.2	37.2	37.2	37.3	37.4	35	35.6	35.8	35.8	35.1	35.6	35.2	35.2	35.3	35.3	35.3	34.9	32.4	32.4	32.4	32.2	32.9	98.7
50. ACIAD0577	37.4	37.2	37.4	37.4	37	37	37.1	38.1	38	37.9	38	37.8	37.8	37.5	37.1	37.1	36.5	37.1	37	36.8	37	37	37	37	37.7	37.9	37.9	37.9	38	37.9	36.4	35.7	35.8	35.8	35	35.6	36.3	36.3	36.5	36.5	36.5	36.2	30.8	30.8	30.8	30.6	30.9	82.1	82.1
51. P24181	47.7	47.7	47.7	47.7	47.7	47.7	48.4	51.8	51.8	51.7	51.8	51.8	51.8	51.5	53	50.6	50.8	51.1	75	75	75	75	75	75	75	68.8	68.8	68.8	68.8	68.7	68.7	69.8	69.9	69.9	70.1	70	63.2	63.2	63.2	63.2	63.2	63	35.7	35.7	35.7	36	36.2	36	35.1
52. P31224	46.3	46.3	46.3	46.3	46.5	47.5	47.5	52	52	52	52	52.1	52.1	51.6	51.1	52	52.1	51.9	76	76	76	76	76	76	76	68.8	68.8	68.8	68.8	68.7	67.6	69	69	69	68.9	68.9	64.3	64.3	64.3	64.3	64.3	64.1	35.2	35.2	35.2	34.5	36.5	35.4	36
53. O68441	45.9	45.8	45.9	45.9	46.2	45.5	46.2	51.3	51.4	51.3	51.4	51.4	51.4	50.5	51.7	48.9	48.1	51.6	70.8	70.8	70.8	70.8	70.8	70.8	71.5	64.3	64.3	64.3	64.5	64.2	65.7	65.2	65.2	65.2	65.4	65.2	59.8	60.1	60.1	60.1	60.1	59.9	33.1	33.1	33.1	33.5	34.4	35.1	34.9
54. Q8GKU1	47.9	47.9	47.9	47.9	48	47.4	48.6	52.5	52.6	52.5	52.6	52.6	52.6	51	53.2	51.7	53.2	52.1	70.6	70.6	70.6	70.6	70.6	70.6	70.4	75	75	75	75	74.8	74	66.4	66.3	66.3	66.5	66.4	59.9	59.9	59.9	59.9	59.9	59.8	36.8	36.8	36.8	36.8	37.5	34.8	34.1
55. Q51073	46.4	46.4	46.4	46.4	46.2	46.4	45.9	50.4	50.4	50.3	50.4	50.4	50.2	49.7	51	51.3	51.5	49.6	66.4	66.4	66.4	66.4	66.4	66.4	66.7	62.7	62.7	62.7	62.8	62.6	62.1	67.9	67.9	67.9	68	68	60.9	60.9	60.9	60.9	60.9	60.6	36.3	36.3	36.3	35.8	37	34.5	34.6
56. P52002	46.3	46.3	46.3	46.3	46.3	45.8	46.7	51.5	51.5	51.4	51.5	51.5	51.5	50.4	52.9	52.3	51.2	51.6	76.6	76.6	76.6	76.6	76.6	76.6	75.9	68.7	68.7	68.7	68.7	68.7	68.3	68.7	68.7	68.7	68.8	68.8	62.3	62.3	62.3	62.3	62.3	62.1	35.7	35.7	35.7	36.9	37.8	36.4	36.1
57. P24177	47.6	47.6	47.6	47.6	47.6	47.2	49.5	52.1	52.2	52.2	52.2	52.3	52.3	51.5	52.5	52.3	51.7	52.5	75.4	75.4	75.4	75.4	75.4	75.4	75.3	68.5	68.5	68.5	68.6	68.4	66.7	68.2	68.2	68.2	68	68.2	63.3	63.3	63.2	63.2	63.2	63.1	35	35	35	35.1	35.5	37	34.8
58. Q9KJC2	45.8	45.8	45.8	45.8	45.8	46.1	46.4	52.1	52.1	52.1	52.1	52.2	52.2	51	52.4	52.4	51.2	50.9	75.7	75.8	75.7	75.7	75.7	75.7	75.4	67.4	67.4	67.4	67.4	67.3	67	68.4	68.4	68.4	68.7	68.5	62.8	62.8	62.8	62.8	62.8	62.6	35.1	35.1	35.1	35	36.4	35.2	35.4
59. O52248	45.8	45.8	45.8	45.8	45.8	46.1	46.4	52.2	52.2	52.2	52.2	52.3	52.3	51	52.3	52.4	51.2	50.9	75.7	75.8	75.7	75.7	75.7	75.7	75.4	67.4	67.4	67.4	67.4	67.3	67	68.4	68.4	68.4	68.7	68.5	62.8	62.8	62.8	62.8	62.8	62.6	35	35	35	35	36.3	35.2	35.4
60. Q9KWV4	46	46	46	46	46.1	45.9	46.5	50.4	50.4	50.3	50.4	50.4	50.4	49	52	51.6	50.8	51.5	73.8	73.8	73.8	73.8	73.8	73.8	73.8	65.3	65.3	65.3	65.5	65.2	65.3	66.8	66.8	66.8	66.8	67.2	62.2	62.2	62.2	62.2	62.2	62.1	36.2	36.2	36.2	35.9	36.5	36.1	36.2
61. Q93PU4	45.9	45.9	45.9	45.9	45.9	46.3	46.2	50.2	50.2	50.1	50.2	50.2	50.2	49.7	52.3	51.7	49.6	51.7	74.2	74.2	74.2	74.2	74.2	74.2	73.4	65.2	65.2	65.2	65.1	65.1	66.3	66.7	66.7	66.7	66.8	66.8	62.6	62.6	62.6	62.6	62.6	62.5	37	37	37	37.2	38	35.7	36.1
62. P76398	49	49	49	49	48.8	48.7	48	54.9	55	55.1	55	55	55.1	54.9	76.4	78.5	64.2	60.3	53.4	53.5	53.4	53.4	53.4	53.4	53.4	49.9	49.9	49.9	50.3	49.9	50.8	53.7	53.7	53.7	53.7	53.7	53.2	53.2	53.1	53.1	53.1	52.9	37	37	37	36.5	36.9	34.7	33.9
63. P37637	46.1	46.1	46.1	46.1	46.2	46.1	46	52.7	52.7	52.8	52.7	52.7	52.7	52.4	51.1	50.3	51.1	51.5	74.9	74.8	74.9	74.9	74.9	74.9	75	67.8	67.8	67.8	67.8	67.7	68.4	67.8	67.8	67.8	67.9	67.8	63.1	63.1	63.1	63.1	63.1	62.9	35.4	35.4	35.4	35.9	36.6	35.3	35.3
64. P76399	47.2	47.4	47.2	47.2	47.5	47	46.3	54.9	55	55.1	55	55	55	54.4	68.8	68.1	73.9	66.6	53.6	53.7	53.6	53.6	53.6	53.6	53.1	53.6	53.6	53.6	53.6	54	53	52.4	52.3	52.3	52.4	52.4	51.8	51.9	51.8	51.8	51.8	51.7	35	35	35	36.3	36.9	36.2	36.2
65. Q9HVI9	47.7	47.8	47.7	47.7	47.8	47.4	49.4	51.3	51.4	51.4	51.4	51.4	51.1	50.6	51.1	53	51.4	51.8	67.9	68	67.9	67.9	67.9	67.9	68	62.5	62.5	62.5	62.5	62.4	63.2	71.8	71.8	71.8	71.9	72.1	63.9	63.9	63.9	63.9	63.9	63.8	36.3	36.3	36.3	36.3	36.5	36	35.6
66. Q9I0Y8	46.3	46.3	46.3	46.3	46	46.4	46.4	51.4	51.4	51.2	51.4	51.3	51.4	51.9	50.9	53.4	50.6	52.4	63.8	63.8	63.8	63.8	63.8	63.8	63	59.6	59.6	59.6	59.5	59.6	59.9	62.5	62.5	62.5	62.4	62.5	80.7	80.7	80.7	80.7	80.7	80.5	36.6	36.6	36.6	36.9	38	33.6	33.4
67. Q9HXW4	84.1	84.1	84.1	84.1	84.2	83.5	82.6	48.9	49	48.9	49	49	49.1	46.8	47.9	47.6	46.3	47.1	46.6	46.6	46.6	46.6	46.6	46.6	47.9	46.9	46.9	46.9	47	46.5	48.4	46.2	46.6	46.6	46.2	46.1	46.2	46.2	46.2	46.2	46.2	46.2	36.2	36.2	36.2	36.2	38.2	35.1	36.3
68. Q6V6X8	45.9	45.9	45.9	45.9	45.6	45.9	46	51	51	50.9	51	51	51	50.9	51.7	52	51.8	50.5	73.9	73.9	73.9	73.9	73.9	73.9	74.3	67	67	67	67	66.9	67.2	68.6	68.6	68.6	68.7	68.7	62.8	62.8	62.8	62.8	62.8	62.6	35.9	35.9	35.9	35.9	37.4	36.1	35.1
69. Q8GC83	46.7	46.7	46.7	46.7	46.6	46.7	47.5	53.3	53.3	53.3	53.3	53.4	53.4	51.9	52.2	52.2	51.3	49.8	71.2	71.2	71.2	71.2	71.2	71.2	70.9	69.1	69.1	69.1	69.1	69	71.2	67.1	67.1	67.1	67.2	67.3	62.5	62.5	62.5	62.5	62.5	62.5	35.1	35.1	35.1	36.4	36.2	32.7	32.4
70. Q4VSJ4	46.1	46.1	46.1	46.1	46.3	46.1	46.9	54.4	54.5	54.5	54.5	54.6	54.6	53.7	53.2	53.4	50.5	50.3	54.4	54.4	54.4	54.4	54.4	54.4	54.9	53.8	53.8	53.8	53.9	53.7	53.5	55.9	56	56	55.8	55.8	54.5	54.6	54.6	54.6	54.6	54.6	35	35	35	34.9	35.8	35	35.6
71. Q9ZNG8	47.1	47.1	47.1	47.1	47.5	47.3	45.9	49.8	49.9	49.9	49.9	50	50	49.4	51.3	51.9	51.5	48.5	66.6	66.6	66.6	66.6	66.6	66.6	66.9	60.3	60.3	60.3	60.3	60.1	59.8	66.3	66.3	66.3	66.3	66.3	60.6	60.6	60.6	60.6	60.6	60.5	36.2	36.2	36.2	35.9	37.3	35.5	36.1
72. Q8RTE4	46.5	46.5	46.5	46.5	46.3	46.4	46.9	53.1	53.2	53.2	53.2	53.3	53.3	51.9	53.4	52.4	51.5	52.4	65	65	65	65	65	65	64.2	61.9	61.9	61.9	61.9	61.9	61.3	62.8	62.8	62.8	62.6	62.9	63.4	63.4	63.4	63.4	63.4	63.1	35.7	35.7	35.7	36.3	36.9	34.8	35.7
73. Q6VV68	44.7	44.7	44.7	44.7	44.7	45.1	46.3	51.1	51.2	51.2	51.2	51.3	51.3	49.8	51.8	52.6	52	51.6	75.7	75.7	75.7	75.7	75.7	75.7	75.6	64.9	64.9	64.9	64.8	64.8	63.6	66.8	66.8	66.8	67	67	63	63	63	63	63	62.8	36.3	36.3	36.3	36.1	36.4	35.6	35.1
74. O87936	45.6	45.6	45.6	45.6	46.5	44.8	45.7	50.5	50.6	50.6	50.6	50.7	50.7	50.6	51.6	49.9	50.9	47.8	67.3	67.4	67.3	67.3	67.3	67.3	67.6	61.8	61.8	61.8	61.8	61.6	61	67.3	67.3	67.3	67	67.2	62.2	62.2	62.2	62.2	62.2	62.1	35.1	35.1	35.1	35.6	36.3	33.7	33.7
75. Q8ZRG9	46.3	46.3	46.3	46.3	46.4	46.8	46.4	51.6	51.6	51.6	51.6	51.6	51.6	51	52.5	54.8	50.9	51.8	65	65	65	65	65	65	64.4	59.5	59.5	59.5	59.5	59.4	60.3	62	62	62	62	61.9	76.2	76.2	76.2	76.2	76.2	76	36.1	36.1	36.1	35.6	37	34.9	35.2
76. Q2AAU3	46.7	46.7	46.7	46.7	47	47.4	47.5	49.5	49.6	49.5	49.6	49.6	49.6	48.9	52.5	52.3	53	51.1	76.3	76.3	76.3	76.3	76.3	76.3	76.3	67.6	67.6	67.6	67.6	67.5	66.8	68.5	68.5	68.5	68.8	68.7	62.2	62.2	62.2	62.2	62.2	62	35.8	35.8	35.8	35.8	36.7	34.3	34.9
77. Q9I6X4	65	64.9	65	65	64.9	64.4	65.3	49.7	49.8	49.7	49.8	49.8	49.9	48.4	47.2	44.6	45.3	47	45.7	45.7	45.7	45.7	45.7	45.7	45.8	45.5	45.5	45.5	45.8	45.7	46.9	47.3	47.2	47.2	47.3	47.2	45.3	45.3	45.3	45.3	45.3	45.1	35	35	35	35.3	36.7	34.9	34.8
78. A7YV33	45.1	45.1	45.1	45.1	45.1	45	45.8	54.4	54.5	54.5	54.5	54.6	54.6	52.9	55.1	53.6	51.7	51.8	56.7	56.7	56.7	56.7	56.7	56.7	56.1	55.1	55.1	55.1	54.9	54.9	54.6	54.3	54.2	54.2	54.5	54.3	53.6	53.6	53.6	53.6	53.6	53.5	36	36	36	35.4	36.2	35.8	36.5
79. A6P7H3	47	46.9	47	47	47.6	47	46.6	49	49.1	49.1	49.1	49.1	49.1	47.9	48.1	47.4	45.7	46.1	47.3	47.3	47.3	47.3	47.3	47.3	47.5	47.2	47.2	47.2	47.4	47.1	47.5	47.6	47.6	47.6	47.4	47.6	46.4	46.4	46.4	46.4	46.4	46.3	36.8	36.8	36.8	36.2	36.4	35.1	35.6
80. Q84GI9	47.1	47.1	47.1	47.1	47.5	46.9	47.5	50.3	50.3	50.2	50.3	50.3	50.4	51	50.6	52.5	51.4	51.2	63.4	63.4	63.4	63.4	63.4	63.4	61.7	59.5	59.5	59.5	59.5	59.3	60	61.5	61.5	61.5	61.2	61.4	74.7	74.7	74.7	74.7	74.7	74.4	36.6	36.6	36.6	35.5	36.8	36	36.2
81. Q9HWH4	47.1	47.4	47.1	47.1	47.4	46.7	47.1	54.9	55	55	55	55	55	54.2	52.4	53.5	50.7	52.9	55.1	55	55.1	55.1	55.1	55.1	54.4	54	54	54	54	53.9	54.2	55.2	55.3	55.3	55.2	55.2	55.7	55.7	55.7	55.7	55.7	55.6	35.6	35.6	35.6	36.3	37.7	35.2	36.2
82. Q9HW27	47	46.9	47	47	46.5	46.4	47.5	54	54.1	54.1	54.1	54.1	54.6	52	55	53.6	51.1	51.3	55.5	55.5	55.5	55.5	55.5	55.5	56	56.5	56.5	56.5	56.5	56.5	54.8	55.3	55.5	55.5	55.3	55.2	55.1	55.1	55.1	55.1	55.1	55	34.8	34.8	34.8	34.8	36.7	36.5	36.5
83. Q4LDT6	45.1	45.1	45.1	45.1	44.8	45.4	43.9	51.4	51.4	51.3	51.4	51.4	51.4	49.3	51.9	53.4	52	51.3	62.9	63	62.9	62.9	62.9	62.9	62.4	57.9	57.9	57.9	57.9	57.8	58.1	61.4	61.5	61.5	61.3	61.3	75.1	75.1	75.1	75.1	75.1	74.8	35.8	35.8	35.8	35.7	36.9	35	35.4
84. Q4LDT8	47.8	47.8	47.8	47.8	47.9	47.8	47.2	54.5	54.6	54.6	54.6	54.6	54.6	54.4	68.1	68.4	63.9	60	52	52	52	52	52	52	51.4	50.6	50.6	50.6	50.8	50.4	50.9	52.3	52.2	52.2	52.1	52	51.9	51.9	51.9	51.9	51.9	51.8	35	35	35	35	35.8	37.4	37.6
85. Q9KVI2	46.7	46.6	46.7	46.7	46.7	46.7	45.6	54.5	54.6	54.5	54.6	54.5	54.8	53.6	55.9	52.7	50.9	49.8	56	56	56	56	56	56	55.2	55	55	55	54.9	54.9	53	56.1	56.1	56.1	56.1	56.2	55.8	55.8	55.8	55.8	55.8	55.6	36.4	36.4	36.4	36.3	37.4	35.2	35.5
86. A6P7H1	55.1	55.1	55.1	55.1	55	54.8	54.7	50	50.1	50.1	50.1	50.2	50.3	48.2	47.7	46.6	44	47.2	46.2	46.2	46.2	46.2	46.2	46.2	46.6	44.8	44.8	44.8	44.8	44.8	45.2	45.8	45.9	45.9	45.9	46	45.7	45.7	45.6	45.6	45.6	45.5	35.5	35.5	35.5	35.4	37.1	36.8	36.8
87. Q9KRG9	57	57.3	57	57	57.3	57.1	56.6	48.5	48.6	48.5	48.6	48.6	48.7	46.6	44.2	45.4	46.1	45.1	45.6	45.7	45.6	45.6	45.6	45.6	45.5	45	45	45	45	44.8	46	45.6	45.4	45.4	45.6	45.9	44	44	43.9	43.9	43.9	43.9	35.9	35.9	35.9	36.1	36.8	35	35.2
88. Q9I0V7	46.9	46.9	46.9	46.9	47	46.7	46.9	54.2	54.2	54.3	54.2	54.3	54.3	53	67.8	67	73.5	64.3	52.8	52.8	52.8	52.8	52.8	52.8	52.2	52.4	52.4	52.4	52.6	52.6	53	53	52.8	52.8	53	53	53.1	53.1	53	53	53	52.9	36.6	36.6	36.6	36.8	38.2	34.8	33.9
89. Q9I0V6	48.7	48.7	48.7	48.7	48.7	48.5	48.2	56.1	56.2	56.3	56.2	56.3	56.4	54.7	78.3	80.6	67.6	61.8	53.5	53.5	53.5	53.5	53.5	53.5	54.1	51.8	51.8	51.8	51.8	51.6	52.3	53	53	53	53	53.1	53	53	52.9	52.9	52.9	52.7	35.1	35.1	35.1	35.4	36.8	35	35
90. A1S_2932	46.9	46.9	46.9	46.9	47	47.1	47.3	48.9	49	48.9	49	49	48.5	48.8	48.3	48	45.2	46	47.6	47.6	47.6	47.6	47.6	47.6	48.5	46.6	46.6	46.6	46.7	46.5	47.1	48.4	48.1	48.1	48.4	48.5	48	47.9	47.9	47.9	47.9	47.9	36.2	36.2	36.2	35.7	35.6	37	37.2
[truncated: 41 more columns]
